# Supplementary material
Source: PubMed Central journal article supplement (PMC4393717)
Supplement: jcmm0016-2872-sd3.pdf [file jcmm0016-2872-sd3.pdf]

| TABLE S2. Analysis of the angiogenesis-related rare disease in subset A according to International Classification of Diseases |          |                                                          |        |                                                                                                     |
|-------------------------------------------------------------------------------------------------------------------------------|----------|----------------------------------------------------------|--------|-----------------------------------------------------------------------------------------------------|
| n°                                                                                                                            | Orpha ID | Rare diseases                                            | ICD-10 | Titles of ICD blocks                                                                                |
| 1                                                                                                                             | 63443    | Gastric cancer                                           | C16    | Neoplasms                                                                                           |
| 2                                                                                                                             | 44890    | Gastrointestinal stromal tumor                           | C26.9  |                                                                                                     |
| 3                                                                                                                             | 70573    | Small cell lung cancer                                   | C34.9  |                                                                                                     |
| 4                                                                                                                             | 3398     | Thymic epithelial tumor                                  | C37    |                                                                                                     |
| 5                                                                                                                             | 668      | Osteosarcoma                                             | C40.9  |                                                                                                     |
| 6                                                                                                                             | 319      | Ewing sarcoma                                            | C41.8  |                                                                                                     |
| 7                                                                                                                             | 50251    | Mesothelioma                                             | C45    |                                                                                                     |
| 8                                                                                                                             | 33276    | Kaposi's sarcoma                                         | C46    |                                                                                                     |
| 9                                                                                                                             | 2126     | Hemangiopericytoma                                       | C49.9  |                                                                                                     |
| 10                                                                                                                            | 151      | Familial renal cell carcinoma                            | C64    |                                                                                                     |
| 11                                                                                                                            | 360      | Glioblastoma                                             | C71.8  |                                                                                                     |
| 12                                                                                                                            | 3395     | Brain tumor                                              | C71.9  |                                                                                                     |
| 13                                                                                                                            | 142      | Anaplastic thyroid carcinoma                             | C73    |                                                                                                     |
| 14                                                                                                                            | 99361    | Familial medullary thyroid carcinoma                     | C73    |                                                                                                     |
| 15                                                                                                                            | 1332     | Medullary thyroid carcinoma                              | C73    |                                                                                                     |
| 16                                                                                                                            | 1501     | Adrenocortical carcinoma*                                | C74.0  |                                                                                                     |
| 17                                                                                                                            | 29072    | Hereditary pheochromocytoma-paraganglioma*               | C74.1  |                                                                                                     |
| 18                                                                                                                            | 717      | Pheochromocytoma and secreting paraganglioma*            | C74.1  |                                                                                                     |
| 19                                                                                                                            | 86886    | Angioimmunoblastic T-cell lymphoma                       | C84.4  |                                                                                                     |
| 20                                                                                                                            | 86885    | Unspecified peripheral T-cell lymphoma                   | C84.4  |                                                                                                     |
| 21                                                                                                                            | 29073    | Multiple myeloma                                         | C90.0  |                                                                                                     |
| 22                                                                                                                            | 58017    | Hairy cell leukemia                                      | C91.4  |                                                                                                     |
| 23                                                                                                                            | 519      | Acute myeloid leukemia                                   | C92.0  |                                                                                                     |
| 24                                                                                                                            | 86829    | Chronic neutrophilic leukemia                            | C92.1  |                                                                                                     |
| 25                                                                                                                            | 733      | Familial adenomatous polyposis                           | D12.6  |                                                                                                     |
| 26                                                                                                                            | 97279    | Insulinoma                                               | D13.7  |                                                                                                     |
| 27                                                                                                                            | 523      | Familial leiomyomatosis                                  | D21.9  |                                                                                                     |
| 28                                                                                                                            | 97287    | Bronchial endocrine tumor                                | D38.1  |                                                                                                     |
| 29                                                                                                                            | 52688    | Myelodysplastic syndromes                                | D46    |                                                                                                     |
| 30                                                                                                                            | 99871    | Eosinophilic granuloma                                   | D76.0  | Diseases of the blood and blood-forming organs and certain disorders involving the immune mechanism |
| 31                                                                                                                            | 83454    | Glomuvenous malformation                                 | Q27.8  | Congenital malformations, deformations and chromosomal abnormalities                                |
| 40                                                                                                                            | 164      | Cerebral cavernous malformations                         | Q28.3  |                                                                                                     |
| 32                                                                                                                            | 2905     | POEMS syndrome*                                          | R16    | Symptoms, signs and abnormal clinical and laboratory findings, not elsewhere classified             |
| 33                                                                                                                            | 524      | Li-Fraumeni syndrome                                     | Z80    | Factors influencing health status and contact with health services                                  |
| 34                                                                                                                            | 213772   | Adenocarcinoma of the cervix uteri                       | NONE   | No ICD classification                                                                               |
| 35                                                                                                                            | 163699   | Alveolar soft-part sarcoma                               | NONE   |                                                                                                     |
| 36                                                                                                                            | 98731    | Arteriovenous fistula                                    | NONE   |                                                                                                     |
| 37                                                                                                                            | 211266   | Arteriovenous malformation                               | NONE   |                                                                                                     |
| 38                                                                                                                            | 157980   | Bladder Cancer                                           | NONE   |                                                                                                     |
| 39                                                                                                                            | 223727   | Bone sarcoma                                             | NONE   |                                                                                                     |
| 40                                                                                                                            | 137667   | Capillary malformation-arteriovenous malformation        | NONE   |                                                                                                     |
| 41                                                                                                                            | 99970    | Dedifferentiated liposarcoma                             | NONE   |                                                                                                     |
| 42                                                                                                                            | 31112    | Dermatofibrosarcoma protuberans                          | NONE   |                                                                                                     |
| 43                                                                                                                            | 141209   | Diffuse lymphatic malformation                           | NONE   |                                                                                                     |
| 44                                                                                                                            | 877      | Endocrine tumor                                          | NONE   |                                                                                                     |
| 45                                                                                                                            | 100092   | Enteropancreatic endocrine tumor                         | NONE   |                                                                                                     |
| 46                                                                                                                            | 157791   | Epithelioid hemangioendothelioma                         | NONE   |                                                                                                     |
| 47                                                                                                                            | 99976    | Esophageal adenocarcinoma                                | NONE   |                                                                                                     |
| 48                                                                                                                            | 99977    | Esophageal squamous cell carcinoma                       | NONE   |                                                                                                     |
| 49                                                                                                                            | 182067   | Glioma                                                   | NONE   |                                                                                                     |
| 50                                                                                                                            | 99915    | Granulosa cell malignant tumor                           | NONE   |                                                                                                     |
| 51                                                                                                                            | 88673    | Hepatocellular carcinoma                                 | NONE   |                                                                                                     |
| 52                                                                                                                            | 227535   | Hereditary breast cancer                                 | NONE   |                                                                                                     |
| 53                                                                                                                            | 213807   | Leiomyosarcoma of the cervix uteri                       | NONE   |                                                                                                     |
| 54                                                                                                                            | 213625   | Leiomyosarcoma of the corpus uteri                       | NONE   |                                                                                                     |
| 55                                                                                                                            | 65285    | Lhermitte-Duclos disease                                 | NONE   |                                                                                                     |
| 56                                                                                                                            | 69078    | Liposarcoma                                              | NONE   |                                                                                                     |
| 57                                                                                                                            | 168811   | Malignant peritoneal mesothelioma                        | NONE   |                                                                                                     |
| 58                                                                                                                            | 3148     | Malignant Schwannoma                                     | NONE   |                                                                                                     |
| 59                                                                                                                            | 98292    | Mastocytosis                                             | NONE   |                                                                                                     |
| 60                                                                                                                            | 97338    | Melanoma of soft part                                    | NONE   |                                                                                                     |
| 61                                                                                                                            | 99967    | Myxoid liposarcoma                                       | NONE   |                                                                                                     |
| 62                                                                                                                            | 209989   | Non-papillary transitional cell carcinoma of the bladder | NONE   |                                                                                                     |
| 63                                                                                                                            | 213504   | Ovarian adenocarcinoma                                   | NONE   |                                                                                                     |
| 64                                                                                                                            | 2800     | Paget disease extramammary                               | NONE   |                                                                                                     |
| 65                                                                                                                            | 217074   | Pancreatic carcinoma                                     | NONE   |                                                                                                     |
| 66                                                                                                                            | 48686    | Primary effusion lymphoma                                | NONE   |                                                                                                     |
| 67                                                                                                                            | 99923    | Primary effusion lymphoma associated with HIV infection  | NONE   |                                                                                                     |
| 68                                                                                                                            | 213528   | Rare adenocarcinoma of the breast                        | NONE   |                                                                                                     |
| 69                                                                                                                            | 180250   | Rare breast cancer                                       | NONE   |                                                                                                     |
| 70                                                                                                                            | 217071   | Renal cell carcinoma                                     | NONE   |                                                                                                     |
| 71                                                                                                                            | 69077    | Rhabdoid tumor                                           | NONE   |                                                                                                     |
| 72                                                                                                                            | 3394     | Soft tissue sarcomas                                     | NONE   |                                                                                                     |
| 73                                                                                                                            | 210584   | Spindle cell hemangioma                                  | NONE   |                                                                                                     |
| 74                                                                                                                            | 67037    | Squamous cell carcinoma of head and neck                 | NONE   |                                                                                                     |
| 75                                                                                                                            | 99868    | Thymic carcinoma                                         | NONE   |                                                                                                     |
| 76                                                                                                                            | 100100   | Thymic tumor                                             | NONE   |                                                                                                     |
| 77                                                                                                                            | 99867    | Thymoma                                                  | NONE   |                                                                                                     |
| 78                                                                                                                            | 1063     | Tufted angioma                                           | NONE   |                                                                                                     |
| 79                                                                                                                            | 39044    | Uveal melanoma                                           | NONE   |                                                                                                     |
| 80                                                                                                                            | 99971    | Well-differentiated liposarcoma                          | NONE   |                                                                                                     |

\*The following rare diseases have also other ICD codes: E24.8 (Endocrine, nutritional and metabolic diseases) for Adrenocortical carcinoma [ORPHA1501], C75.5, D35.0 and D35.6 (Diseases of the blood and blood-forming organs and certain disorders involving the immune mechanism) respectively, for Hereditary pheochromocytoma-paraganglioma syndrome [ORPHA29072] and Pheochromocytoma and secreting paraganglioma [ORPHA717], and finally D18.0, D47.2 (Neoplasms) and G61.8 (Diseases of the nervous system) for POEMS syndrome [ORPHA2905]. In grey color there is no ICD classification.
