# Supplementary material
Source: PubMed Central journal article supplement (PMC4393717)
Supplement: jcmm0016-2872-sd4.pdf [file jcmm0016-2872-sd4.pdf]

| <b>TABLE S3. Analysis of the angiogenesis-related rare disease in subset B according to International Classification of Diseases</b> |                 |                                        |               |                                                                                                     |
|--------------------------------------------------------------------------------------------------------------------------------------|-----------------|----------------------------------------|---------------|-----------------------------------------------------------------------------------------------------|
| <b>n°</b>                                                                                                                            | <b>Orpha ID</b> | <b>Rare disease</b>                    | <b>ICD-10</b> | <b>Titles of ICD blocks</b>                                                                         |
| 1                                                                                                                                    | 2451            | Mucocutaneous venous malformations     | Q27.9         | Congenital malformations, deformations and chromosomal abnormalities                                |
| 2                                                                                                                                    | 2414            | Congenital pulmonary lymphangiectasia* | Q34.8         |                                                                                                     |
| 3                                                                                                                                    | 636             | Neurofibromatosis type 1               | Q85.0         |                                                                                                     |
| 4                                                                                                                                    | 2869            | Peutz-Jeghers syndrome                 | Q85.8         |                                                                                                     |
| 5                                                                                                                                    | 3205            | Sturge-Weber syndrome                  | Q85.8         |                                                                                                     |
| 6                                                                                                                                    | 892             | Von Hippel-Lindau disease              | Q85.8         |                                                                                                     |
| 7                                                                                                                                    | 201             | Cowden syndrome*                       | Q85.9         |                                                                                                     |
| 8                                                                                                                                    | 191             | Cockayne syndrome                      | Q87.1         |                                                                                                     |
| 9                                                                                                                                    | 109             | Bannayan-Riley-Ruvalcaba syndrome      | Q87.8         |                                                                                                     |
| 10                                                                                                                                   | 652             | Multiple endocrine neoplasia type 1    | D44.8         | Neoplasms                                                                                           |
| 11                                                                                                                                   | 729             | Polycythemia vera                      | D45           |                                                                                                     |
| 12                                                                                                                                   | 824             | Myelofibrosis with myeloid metaplasia  | D47.1         |                                                                                                     |
| 13                                                                                                                                   | 389             | Langerhans cell histiocytosis          | D76.0         | Diseases of the blood and blood-forming organs and certain disorders involving the immune mechanism |
| 14                                                                                                                                   | 913             | Zollinger-Ellison syndrome             | E16.4         | Endocrine, nutritional and metabolic diseases                                                       |
| 15                                                                                                                                   | 324             | Fabry disease                          | E75.2         |                                                                                                     |
| 16                                                                                                                                   | 521             | Chronic myeloid leukemia               | C92.1         | Neoplasms                                                                                           |
| 17                                                                                                                                   | 774             | Rendu-Osler-Weber disease              | I.78.0        | Diseases of the circulatory system                                                                  |
| 18                                                                                                                                   | 53721           | Cobb syndrome                          | NONE          | No ICD classification                                                                               |
| 19                                                                                                                                   | 73              | Gorham-Stout disease                   | NONE          |                                                                                                     |
| 20                                                                                                                                   | 90308           | Klippel-Trenaunay syndrome             | NONE          |                                                                                                     |
| 21                                                                                                                                   | 79383           | Lymphedema                             | NONE          |                                                                                                     |
| 22                                                                                                                                   | 42775           | PHACE syndrome                         | NONE          |                                                                                                     |
| 23                                                                                                                                   | 77240           | Primary lymphedema                     | NONE          |                                                                                                     |

\*Congenital pulmonary lymphangiectasia [ORPHA2414] has also D18.1 ICD code (Neoplasms) and Cowden syndrome [ORPHA201] has also Z80.9 (Factors influencing health status and contact with health services).
