# Supplementary material
Source: PubMed Central journal article supplement (PMC4393717)
Supplement: jcmm0016-2872-sd5.pdf [file jcmm0016-2872-sd5.pdf]

| n° | Orpha ID | Rare diseases                                                                           | ICD-10 | Titles of ICD blocks                                                                                |
|----|----------|-----------------------------------------------------------------------------------------|--------|-----------------------------------------------------------------------------------------------------|
| 1  | 855      | Hashimoto struma                                                                        | E06.3  | Endocrine, nutritional and metabolic diseases                                                       |
| 2  | 178029   | Central diabetes insipidus                                                              | E23.2  |                                                                                                     |
| 3  | 99889    | Ectopic Cushing syndrome                                                                | E24.3  |                                                                                                     |
| 4  | 3453     | Autoimmune polyendocrinopathy type 1                                                    | E31.0  |                                                                                                     |
| 5  | 355      | Gaucher disease                                                                         | E75.2  |                                                                                                     |
| 6  | 77260    | Gaucher disease, type 2                                                                 | E75.2  |                                                                                                     |
| 7  | 77261    | Gaucher disease, type 3                                                                 | E75.2  |                                                                                                     |
| 8  | 85212    | Perinatal-lethal Gaucher disease                                                        | E75.2  |                                                                                                     |
| 9  | 530      | Lipoid proteinosis                                                                      | E75.5  |                                                                                                     |
| 10 | 565      | Menkes disease                                                                          | E83.0  |                                                                                                     |
| 11 | 905      | Wilson disease                                                                          | E83.0  |                                                                                                     |
| 12 | 183      | Churg-Strauss syndrome                                                                  | M30.1  |                                                                                                     |
| 13 | 2331     | Kawasaki disease                                                                        | M30.3  |                                                                                                     |
| 14 | 93585    | Acquired thrombotic thrombocytopenic purpura due to anti-ADAMTS 13                      | M31.3  |                                                                                                     |
| 15 | 536      | Systemic lupus erythematosus                                                            | M32    |                                                                                                     |
| 16 | 801      | Scleroderma                                                                             | M34    |                                                                                                     |
| 17 | 117      | Behcet disease                                                                          | M35.2  |                                                                                                     |
| 18 | 49041    | Retroperitoneal fibrosis                                                                | M35.5  |                                                                                                     |
| 19 | 337      | Fibrodysplasia ossificans progressiva                                                   | M61.1  |                                                                                                     |
| 20 | 2778     | Juvenile chronic recurrent multifocal osteomyelitis                                     | M86.3  | Diseases of the blood and blood-forming organs and certain disorders involving the immune mechanism |
| 21 | 2134     | Atypical hemolytic uremic syndrome                                                      | D58.8  |                                                                                                     |
| 22 | 90038    | Typical hemolytic uremic syndrome                                                       | D59.3  |                                                                                                     |
| 23 | 447      | Paroxysmal nocturnal hemoglobinuria                                                     | D59.5  |                                                                                                     |
| 24 | 903      | Von Willebrand disease                                                                  | D68.0  |                                                                                                     |
| 25 | 54057    | Thrombotic thrombocytopenic purpura                                                     | D69.4  |                                                                                                     |
| 26 | 51636    | WHIM syndrome                                                                           | D81.0  |                                                                                                     |
| 27 | 797      | Sarcoidosis                                                                             | D86    | Diseases of the circulatory system                                                                  |
| 28 | 422      | Idiopathic and/or familial pulmonary arterial hypertension                              | I27.0  |                                                                                                     |
| 29 | 136      | CADASIL syndrome*                                                                       | I67.3  |                                                                                                     |
| 30 | 2573     | Moyamoya disease                                                                        | I67.5  |                                                                                                     |
| 31 | 36258    | Buerger's disease                                                                       | I73.1  |                                                                                                     |
| 32 | 131      | Budd-Chiari syndrome                                                                    | I82.0  |                                                                                                     |
| 33 | 538      | Lymphangioliomyomatosis                                                                 | I89.8  | Diseases of the eye and adnexa                                                                      |
| 34 | 179      | Chorioretinopathy, Birdshot type                                                        | H30.9  |                                                                                                     |
| 35 | 1571     | Knobloch syndrome                                                                       | H33.5  |                                                                                                     |
| 36 | 190      | Coats disease                                                                           | H35.0  |                                                                                                     |
| 37 | 40923    | Eales disease                                                                           | H35.0  |                                                                                                     |
| 38 | 90050    | Retinopathy of prematurity                                                              | H35.1  | Congenital malformations, deformations and chromosomal abnormalities                                |
| 39 | 649      | Norrie disease                                                                          | Q15.8  |                                                                                                     |
| 41 | 2092     | Focal dermal hypoplasia                                                                 | Q82.8  |                                                                                                     |
| 42 | 758      | Pseudoxanthoma elasticum                                                                | Q82.8  |                                                                                                     |
| 43 | 206      | Crohn disease                                                                           | K50    | Diseases of the digestive system                                                                    |
| 44 | 2137     | Chronic autoimmune hepatitis                                                            | K75.4  |                                                                                                     |
| 45 | 803      | Amyotrophic lateral sclerosis                                                           | G12.2  | Diseases of the nervous system                                                                      |
| 46 | 563      | Peripartum cardiomyopathy                                                               | O90.3  | Pregnancy, childbirth and the puerperium                                                            |
| 47 | 2346     | Angio-osteohypertrophic syndrome*                                                       | D18.0  | Neoplasms                                                                                           |
| 48 | 79126    | Acute interstitial pneumonia                                                            | NONE   | No ICD classification                                                                               |
| 49 | 279      | Age-related macular degeneration                                                        | NONE   |                                                                                                     |
| 50 | 160      | Castleman disease                                                                       | NONE   |                                                                                                     |
| 51 | 98044    | Central nervous system malformation                                                     | NONE   |                                                                                                     |
| 52 | 2041     | Coronary arterial fistulas                                                              | NONE   |                                                                                                     |
| 53 | 137698   | Cytomegalovirus disease in patients with impaired cell mediated immunity deemed at risk | NONE   |                                                                                                     |
| 54 | 97339    | Dural sinus malformation                                                                | NONE   |                                                                                                     |
| 55 | 199323   | Endophthalmitis                                                                         | NONE   |                                                                                                     |
| 56 | 221126   | Fowler syndrome                                                                         | NONE   |                                                                                                     |
| 57 | 95509    | Granulomatous hypophysitis                                                              | NONE   |                                                                                                     |
| 58 | 158032   | Hemophagocytic syndrome                                                                 | NONE   |                                                                                                     |
| 59 | 85458    | Hereditary cerebral hemorrhage with amyloidosis                                         | NONE   |                                                                                                     |
| 60 | 100006   | Hereditary cerebral hemorrhage with amyloidosis, Dutch type                             | NONE   |                                                                                                     |
| 61 | 69665    | Intrahepatic cholestasis of pregnancy                                                   | NONE   |                                                                                                     |
| 62 | 93448    | Lysosomal storage disease with skeletal involvement                                     | NONE   |                                                                                                     |
| 63 | 101338   | Mediterranean spotted fever                                                             | NONE   |                                                                                                     |
| 64 | 54370    | Membranoproliferative glomerulonephritis                                                | NONE   |                                                                                                     |
| 65 | 93686    | Multicentric Castleman disease                                                          | NONE   |                                                                                                     |
| 66 | 94058    | Neovascular glaucoma                                                                    | NONE   |                                                                                                     |
| 67 | 182090   | Pulmonary arterial hypertension                                                         | NONE   |                                                                                                     |
| 68 | 199241   | Pulmonary capillary hemangiomatosis                                                     | NONE   |                                                                                                     |
| 69 | 71198    | Rare pulmonary hypertension                                                             | NONE   |                                                                                                     |
| 70 | 60032    | Recurrent respiratory papillomatosis                                                    | NONE   |                                                                                                     |
| 71 | 102021   | Rickettsiae disease                                                                     | NONE   |                                                                                                     |
| 72 | 36426    | Stevens-Johnson syndrome                                                                | NONE   |                                                                                                     |
| 73 | 3243     | Sweet syndrome                                                                          | NONE   |                                                                                                     |
| 74 | 90291    | Systemic sclerosis                                                                      | NONE   |                                                                                                     |
| 75 | 93573    | Thrombotic microangiopathy                                                              | NONE   |                                                                                                     |
| 76 | 52759    | Vasculitis                                                                              | NONE   |                                                                                                     |
| 77 | 98668    | Vitreoretinopathy                                                                       | NONE   |                                                                                                     |

\*CADASIL syndrome [ORPHA136] and Angio-osteohypertrophic syndrome [ORPHA2346] have also F01.1 (Mental and behavioural disorders) and M85.8 (Diseases of the musculoskeletal system and connective tissue) ICD codes respectively.
