# Supplementary material
Source: PubMed Central journal article supplement (PMC4393717)
Supplement: jcmm0016-2872-sd6.pdf [file jcmm0016-2872-sd6.pdf]

**TABLE S5. Angiogenesis-related rare diseases associated to a single gene**

| n° | Orpha ID   | Rare diseases                                     | Opha genes ID |
|----|------------|---------------------------------------------------|---------------|
| 1  | 3453 (C)   | Autoimmune polyendocrinopathy type 1              | 119562        |
| 2  | 109 (B)    | Bannayan-Riley-Ruvalcaba syndrome                 | 118128        |
| 3  | 136 (C)    | CADASIL syndrome                                  | 123860        |
| 4  | 137667 (A) | Capillary malformation-arteriovenous malformation | 118231        |
| 5  | 178029 (C) | Central diabetes insipidus                        | 118943        |
| 6  | 179 (C)    | Chorioretinopathy, Birdshot type                  | 218376        |
| 7  | 190 (C)    | Coats disease                                     | 123713        |
| 8  | 99977 (A)  | Esophageal squamous cell carcinoma                | 159233        |
| 9  | 324 (B)    | Fabry disease                                     | 122153        |
| 10 | 733 (A)    | Familial adenomatous polyposis                    | 123393        |
| 11 | 523 (A)    | Familial leiomyomatosis                           | 121823        |
| 12 | 337 (C)    | Fibrodysplasia ossificans progressiva             | 117759        |
| 13 | 2092 (C)   | Focal dermal hypoplasia                           | 159255        |
| 14 | 221126 (C) | Fowler syndrome                                   | 227058        |
| 15 | 77260 (C)  | Gaucher disease, type 2                           | 122039        |
| 16 | 77261 (C)  | Gaucher disease, type 3                           | 122039        |
| 17 | 83454 (A)  | Glomuvenous malformation                          | 122172        |
| 18 | 855 (C)    | Hashimoto struma                                  | 159574        |
| 19 | 90308 (B)  | Klippel-Trenaunay syndrome                        | 119516        |
| 20 | 1571 (C)   | Knobloch syndrome                                 | 120702        |
| 21 | 65285 (A)  | Lhermitte-Duclos disease                          | 118128        |
| 22 | 530 (C)    | Lipoid proteinosis                                | 121261        |
| 23 | 69078 (A)  | Liposarcoma                                       | 159615        |
| 24 | 98292 (A)  | Mastocytosis                                      | 122862        |
| 25 | 1332 (A)   | Medullary thyroid carcinoma                       | 118274        |
| 26 | 54370 (C)  | Membranoproliferative glomerulonephritis          | 119363        |
| 27 | 565 (C)    | Menkes disease                                    | 118879        |
| 28 | 2573 (C)   | Moyamoya disease                                  | 138831        |
| 29 | 2451 (B)   | Mucocutaneous venous malformations                | 120020        |
| 30 | 824 (B)    | Myelofibrosis with myeloid metaplasia             | 122727        |
| 31 | 99967 (A)  | Myxoid liposarcoma                                | 159615        |
| 32 | 94058 (C)  | Neovascular glaucoma                              | 83299         |
| 33 | 649 (C)    | Norrie disease                                    | 123713        |
| 34 | 85212 (C)  | Perinatal-lethal Gaucher disease                  | 122039        |
| 35 | 2869 (B)   | Peutz-Jeghers syndrome                            | 119884        |
| 36 | 729 (B)    | Polycythemia vera                                 | 122727        |
| 37 | 758 (C)    | Pseudoxanthoma elasticum                          | 117658        |
| 38 | 90050 (C)  | Retinopathy of prematurity                        | 123713        |
| 39 | 797 (C)    | Sarcoidosis                                       | 122427        |
| 40 | 54057 (C)  | Thrombotic thrombocytopenic purpura               | 117776        |
| 41 | 892 (B)    | Von Hippel-Lindau disease                         | 120467        |
| 42 | 903 (C)    | Von Willebrand disease                            | 120487        |
| 43 | 51636 (C)  | WHIM syndrome                                     | 120914        |
| 44 | 905 (C)    | Wilson disease                                    | 118882        |
| 45 | 913 (B)    | Zollinger-Ellison syndrome                        | 123196        |

(A), (B), (C) correspond to subset A, B and C respectively.
