# Supplementary material
Source: PubMed Central journal article supplement (PMC4393717)
Supplement: jcmm0016-2872-sd7.pdf [file jcmm0016-2872-sd7.pdf]

**TABLE S6. Angiogenesis-related rare diseases associated to two or more genes**

| nº | Orpha ID   | Rare disease                                               | 1              | 2      | 3      | 4      | 5      | 6      | 7      | 8      | 9      | 10     | 11     | 12     | 13     | 14     | 15     | 16     | 17     | 18     | 19     | 20     | 21     | 22     |
|----|------------|------------------------------------------------------------|----------------|--------|--------|--------|--------|--------|--------|--------|--------|--------|--------|--------|--------|--------|--------|--------|--------|--------|--------|--------|--------|--------|
|    |            |                                                            | Orpha Genes ID |        |        |        |        |        |        |        |        |        |        |        |        |        |        |        |        |        |        |        |        |        |
| 1  | 93448 (C)  | Lysosomal storage disease with skeletal involvement        | 119513         | 121429 | 120888 | 121963 | 122002 | 122156 | 122216 | 122221 | 122230 | 122352 | 122412 | 122556 | 122569 | 122572 | 123328 | 123131 | 123672 | 123759 | 118674 | 118753 | 119493 | 119899 |
| 2  | 3394 (A)   | Soft tissue sarcomas                                       | 168413         | 120704 | 209329 | 209325 | 121642 | 121908 | 159615 | 124090 | 124100 | 168409 | 159544 | 225351 | 119735 | 119868 | 119874 | 158446 | 158451 | 158453 | 120036 | 120549 |        |        |
| 3  | 519 (A)    | Acute myeloid leukemia                                     | 171659         | 139165 | 233165 | 168426 | 123248 | 123271 | 159111 | 159793 | 168420 | 160317 | 117898 | 118227 | 118242 | 158396 | 159097 | 138366 | 159615 | 123606 | 171663 |        |        |        |
| 4  | 803 (C)    | Amyotrophic lateral sclerosis                              | 231605         | 124021 | 239891 | 239894 | 239896 | 119644 | 159700 | 225389 | 159207 | 159615 | 123752 | 123908 | 209470 | 118627 | 119776 | 158581 | 120453 |        |        |        |        |        |
| 5  | 3395 (A)   | Brain tumor                                                | 160020         | 123393 | 120881 | 121115 | 121311 | 122164 | 122184 | 122186 | 123308 | 123600 | 123841 | 117805 | 118126 | 118128 | 119896 | 120204 | 120574 |        |        |        |        |        |
| 6  | 158032 (C) | Hemophagocytic syndrome                                    | 121374         | 119045 | 121227 | 122480 | 122483 | 122486 | 122490 | 122492 | 123318 | 117995 | 118188 | 119892 | 227102 | 120416 |        |        |        |        |        |        |        |        |
| 7  | 98668 (C)  | Vitreoretinopathy                                          | 119029         | 120690 | 120693 | 120702 | 120710 | 120748 | 121977 | 159740 | 123115 | 123713 | 123912 | 118411 | 225339 | 120457 |        |        |        |        |        |        |        |        |
| 8  | 180250 (A) | Rare breast cancer                                         | 201093         | 119068 | 119072 | 119080 | 119394 | 139189 | 169947 | 118128 | 118208 | 229784 | 118554 | 118561 |        |        |        |        |        |        |        |        |        |        |
| 9  | 217071 (A) | Renal cell carcinoma                                       | 121084         | 121086 | 121823 | 121826 | 121839 | 122538 | 123201 | 123989 | 117989 | 118347 | 120036 | 120467 |        |        |        |        |        |        |        |        |        |        |
| 10 | 151 (A)    | Familial renal cell carcinoma                              | 121823         | 121839 | 117989 | 120036 | 121084 | 121086 | 121826 | 122538 | 123989 | 118347 | 120467 |        |        |        |        |        |        |        |        |        |        |        |
| 11 | 182067 (A) | Glial tumor                                                | 121115         | 121311 | 122164 | 122184 | 122186 | 123308 | 118128 | 120204 | 120574 |        |        |        |        |        |        |        |        |        |        |        |        |        |
| 12 | 360 (A)    | Glioblastoma                                               | 121115         | 121311 | 122164 | 122184 | 122186 | 123308 | 120204 | 120574 |        |        |        |        |        |        |        |        |        |        |        |        |        |        |
| 13 | 717 (A)    | Pheochromocytoma and secreting paraganglioma               | 118274         | 118549 | 209279 | 118554 | 118558 | 118561 | 227079 | 120467 |        |        |        |        |        |        |        |        |        |        |        |        |        |        |
| 14 | 223727 (A) | Bone sarcoma                                               | 119394         | 121608 | 121633 | 235504 | 121642 | 121645 | 121846 |        |        |        |        |        |        |        |        |        |        |        |        |        |        |        |
| 15 | 217074 (A) | Pancreatic carcinoma                                       | 119072         | 119306 | 122879 | 121424 | 139189 | 119727 | 120204 |        |        |        |        |        |        |        |        |        |        |        |        |        |        |        |
| 16 | 279 (C)    | Age-related macular degeneration                           | 236977         | 117623 | 119363 | 121746 | 122442 | 138706 |        |        |        |        |        |        |        |        |        |        |        |        |        |        |        |        |
| 17 | 2134 (C)   | Atypical hemolytic uremic syndrome                         | 160064         | 119259 | 158379 | 119363 | 119371 | 120088 |        |        |        |        |        |        |        |        |        |        |        |        |        |        |        |        |
| 18 | 29072 (A)  | Hereditary pheochromocytoma-paraganglioma syndrome         | 118549         | 209279 | 118554 | 118558 | 118561 | 227079 |        |        |        |        |        |        |        |        |        |        |        |        |        |        |        |        |
| 19 | 191 (B)    | Cockayne syndrome                                          | 132271         | 121590 | 139163 | 121599 | 121604 |        |        |        |        |        |        |        |        |        |        |        |        |        |        |        |        |        |
| 20 | 206 (C)    | Crohn disease                                              | 235213         | 122623 | 122638 | 123845 | 118777 |        |        |        |        |        |        |        |        |        |        |        |        |        |        |        |        |        |
| 21 | 319 (A)    | Ewing sarcoma                                              | 235504         | 121608 | 121633 | 121642 | 121846 |        |        |        |        |        |        |        |        |        |        |        |        |        |        |        |        |        |
| 22 | 79383 (B)  | Lymphedema                                                 | 121872         | 121891 | 122110 | 119788 |        |        |        |        |        |        |        |        |        |        |        |        |        |        |        |        |        |        |
| 23 | 67037 (A)  | Squamous cell carcinoma of head and neck                   | 122654         | 122656 | 118128 | 120152 |        |        |        |        |        |        |        |        |        |        |        |        |        |        |        |        |        |        |
| 24 | 521 (B)    | Chronic myeloid leukemia                                   | 117691         | 119016 | 118423 |        |        |        |        |        |        |        |        |        |        |        |        |        |        |        |        |        |        |        |
| 25 | 201 (B)    | Cowden syndrome                                            | 118128         | 118554 | 118561 |        |        |        |        |        |        |        |        |        |        |        |        |        |        |        |        |        |        |        |
| 26 | 422 (C)    | Idiopathic and/or familial pulmonary arterial hypertension | 117764         | 119057 | 189338 |        |        |        |        |        |        |        |        |        |        |        |        |        |        |        |        |        |        |        |
| 27 | 636 (B)    | Neurofibromatosis type 1                                   | 123772         | 140074 | 159228 |        |        |        |        |        |        |        |        |        |        |        |        |        |        |        |        |        |        |        |
| 28 | 774 (B)    | Rendu-Osler-Weber disease                                  | 119727         | 117764 | 121536 |        |        |        |        |        |        |        |        |        |        |        |        |        |        |        |        |        |        |        |
| 29 | 163699 (A) | Alveolar soft-part sarcoma                                 | 168413         | 120036 |        |        |        |        |        |        |        |        |        |        |        |        |        |        |        |        |        |        |        |        |
| 30 | 2346 (C)   | Angio-osteohypertrophic syndrome                           | 119516         | 118231 |        |        |        |        |        |        |        |        |        |        |        |        |        |        |        |        |        |        |        |        |
| 31 | 31112 (A)  | Dermatofibrosarcoma protuberans                            | 120704         | 168409 |        |        |        |        |        |        |        |        |        |        |        |        |        |        |        |        |        |        |        |        |
| 32 | 877 (A)    | Endocrine tumor                                            | 122661         | 118561 |        |        |        |        |        |        |        |        |        |        |        |        |        |        |        |        |        |        |        |        |
| 33 | 63443 (A)  | Gastric cancer                                             | 119276         | 123585 |        |        |        |        |        |        |        |        |        |        |        |        |        |        |        |        |        |        |        |        |
| 34 | 44890 (A)  | Gastrointestinal stromal tumor                             | 122862         | 124154 |        |        |        |        |        |        |        |        |        |        |        |        |        |        |        |        |        |        |        |        |
| 35 | 355 (C)    | Gaucher disease                                            | 122039         | 118095 |        |        |        |        |        |        |        |        |        |        |        |        |        |        |        |        |        |        |        |        |
| 36 | 88673 (A)  | Hepatocellular carcinoma                                   | 120881         | 123201 |        |        |        |        |        |        |        |        |        |        |        |        |        |        |        |        |        |        |        |        |
| 37 | 85458 (C)  | Hereditary cerebral hemorrhage with amyloidosis            | 121393         | 120865 |        |        |        |        |        |        |        |        |        |        |        |        |        |        |        |        |        |        |        |        |
| 38 | 69665 (C)  | Intrahepatic cholestasis of pregnancy                      | 117639         | 118885 |        |        |        |        |        |        |        |        |        |        |        |        |        |        |        |        |        |        |        |        |
| 39 | 524 (A)    | Li-Fraumeni syndrome                                       | 119394         | 120204 |        |        |        |        |        |        |        |        |        |        |        |        |        |        |        |        |        |        |        |        |
| 40 | 538 (C)    | Lymphangioliomyomatosis                                    | 120309         | 120315 |        |        |        |        |        |        |        |        |        |        |        |        |        |        |        |        |        |        |        |        |
| 41 | 97338 (A)  | Melanoma of soft part                                      | 201770         | 121642 |        |        |        |        |        |        |        |        |        |        |        |        |        |        |        |        |        |        |        |        |
| 42 | 652 (B)    | Multiple endocrine neoplasia type 1                        | 200995         | 123196 |        |        |        |        |        |        |        |        |        |        |        |        |        |        |        |        |        |        |        |        |
| 43 | 29073 (A)  | Multiple myeloma                                           | 122589         | 122680 |        |        |        |        |        |        |        |        |        |        |        |        |        |        |        |        |        |        |        |        |
| 44 | 52688 (A)  | Myelodysplastic syndromes                                  | 160253         | 168342 |        |        |        |        |        |        |        |        |        |        |        |        |        |        |        |        |        |        |        |        |
| 45 | 668 (A)    | Osteosarcoma                                               | 119394         | 118239 |        |        |        |        |        |        |        |        |        |        |        |        |        |        |        |        |        |        |        |        |
| 46 | 77240 (B)  | Primary lymphedema                                         | 121872         | 122110 |        |        |        |        |        |        |        |        |        |        |        |        |        |        |        |        |        |        |        |        |
| 47 | 69077 (A)  | Rhabdoid tumor                                             | 225351         | 119735 |        |        |        |        |        |        |        |        |        |        |        |        |        |        |        |        |        |        |        |        |
| 48 | 536 (C)    | Systemic lupus erythematosus                               | 120799         | 120878 |        |        |        |        |        |        |        |        |        |        |        |        |        |        |        |        |        |        |        |        |

(A), (B), (C) correspond to subset A, B and C respectively.
