# Supplementary material
Source: PubMed Central journal article supplement (PMC4393717)
Supplement: jcmm0016-2872-sd8.pdf [file jcmm0016-2872-sd8.pdf]

**TABLE S7. Angiogenesis-related rare diseases associated to a single drug**

| n° | ID         | Rare disease                                                                            | Orpha drugs ID |
|----|------------|-----------------------------------------------------------------------------------------|----------------|
| 1  | 93585 (C)  | Acquired thrombotic thrombocytopenic purpura due to anti-ADAMTS 13 antibodies           | 168064         |
| 2  | 1501 (A)   | Adrenocortical carcinoma                                                                | 56892          |
| 3  | 279 (C)    | Age-related macular degeneration                                                        | 34208          |
| 4  | 142 (A)    | Anaplastic thyroid carcinoma                                                            | 87299          |
| 5  | 2137 (C)   | Chronic autoimmune hepatitis                                                            | 24857          |
| 6  | 183 (C)    | Churg-Strauss syndrome                                                                  | 45983          |
| 7  | 137698 (C) | Cytomegalovirus disease in patients with impaired cell mediated immunity deemed at risk | 103136         |
| 8  | 99889 (C)  | Ectopic Cushing syndrome                                                                | 65885          |
| 9  | 83454 (A)  | Glomuvenous malformation                                                                | 133579         |
| 10 | 158032 (C) | Hemophagocytic syndrome                                                                 | 222653         |
| 11 | 2331 (C)   | Kawasaki disease                                                                        | 24995          |
| 12 | 389 (B)    | Langerhans cell histiocytosis                                                           | 46261          |
| 13 | 524 (A)    | Li-Fraumeni syndrome                                                                    | 82084          |
| 14 | 98292 (A)  | Mastocytosis                                                                            | 66150          |
| 15 | 2451 (B)   | Mucocutaneous venous malformations                                                      | 133579         |
| 16 | 209989 (A) | Non-papillary transitional cell carcinoma of the bladder                                | 90183          |
| 17 | 717 (A)    | Pheochromocytoma and secreting paraganglioma                                            | 25005          |
| 18 | 71198 (C)  | Rare pulmonary hypertension                                                             | 24859          |
| 19 | 774 (B)    | Rendu-Osler-Weber disease                                                               | 222389         |
| 20 | 536 (C)    | Systemic lupus erythematosus                                                            | 80136          |
| 21 | 90038 (C)  | Typical hemolytic uremic syndrome                                                       | 65881          |
| 22 | 39044 (A)  | Uveal melanoma                                                                          | 88884          |

(A), (B), (C) correspond to subset A, B and C respectively.
