# Supplementary material
Source: PubMed Central journal article supplement (PMC4393717)
Supplement: jcmm0016-2872-sd9.pdf [file jcmm0016-2872-sd9.pdf]

| TABLE S8. Angiogenesis-related rare diseases associated to two or more drugs |            |                                                            | 1              | 2      | 3      | 4      | 5      | 6      | 7      | 8      | 9      | 10     | 11     | 12     | 13     | 14     | 15     | 16     | 17     | 18     | 19     | 20     | 21     | 22     | 23     | 24     | 25     | 26     | 27     | 28     | 29     | 30    | 31     | 32    | 33     |  |  |  |
|------------------------------------------------------------------------------|------------|------------------------------------------------------------|----------------|--------|--------|--------|--------|--------|--------|--------|--------|--------|--------|--------|--------|--------|--------|--------|--------|--------|--------|--------|--------|--------|--------|--------|--------|--------|--------|--------|--------|-------|--------|-------|--------|--|--|--|
| nº                                                                           | Orpha ID   | Rare disease                                               | Orpha Drugs ID |        |        |        |        |        |        |        |        |        |        |        |        |        |        |        |        |        |        |        |        |        |        |        |        |        |        |        |        |       |        |       |        |  |  |  |
|                                                                              |            |                                                            |                |        |        |        |        |        |        |        |        |        |        |        |        |        |        |        |        |        |        |        |        |        |        |        |        |        |        |        |        |       |        |       |        |  |  |  |
| 1                                                                            | 519 (A)    | Acute myeloid leukemia                                     | 218403         | 70935  | 211472 | 168048 | 74111  | 99382  | 170127 | 101395 | 84248  | 41289  | 86359  | 72855  | 168046 | 77330  | 42780  | 66131  | 84332  | 82070  | 82055  | 178071 | 66150  | 25033  | 99388  | 178092 | 103145 | 138008 | 139925 | 66147  | 189162 | 69293 | 133649 | 75315 | 222391 |  |  |  |
| 2                                                                            | 360 (A)    | Glioblastoma                                               | 180761         | 82047  | 219658 | 75923  | 82391  | 66129  | 88972  | 83714  | 42560  | 103193 | 81687  | 102673 | 76236  | 133581 | 168056 | 75313  | 84325  | 57248  | 101415 | 133607 | 84254  | 102676 | 82913  | 69292  | 103213 | 138645 | 178090 | 147696 | 103217 | 82093 | 227017 | 87164 |        |  |  |  |
| 3                                                                            | 182067 (A) | Glioma                                                     | 180761         | 82047  | 219658 | 75923  | 82391  | 66129  | 88972  | 83714  | 103193 | 81687  | 102673 | 76236  | 168056 | 75313  | 84325  | 101415 | 133607 | 84254  | 102676 | 82913  | 69292  | 103213 | 138645 | 178090 | 147696 | 103217 |        |        |        |       |        |       |        |  |  |  |
| 4                                                                            | 217071 (A) | Renal cell carcinoma                                       | 222637         | 100876 | 74111  | 75353  | 24930  | 66129  | 83685  | 87164  | 88391  | 102672 | 92356  | 82089  | 88975  | 84253  | 133601 | 133609 | 99394  | 78526  | 133633 | 86784  | 75075  | 75087  | 92359  | 82051  |        |        |        |        |        |       |        |       |        |  |  |  |
| 5                                                                            | 29073 (A)  | Multiple myeloma                                           | 75375          | 83676  | 41289  | 58381  | 138628 | 102672 | 133575 | 82086  | 168117 | 65971  | 133597 | 70917  | 75737  | 42580  | 168111 | 65967  | 168062 | 201839 | 133627 | 24888  | 81659  | 222635 | 222397 |        |        |        |        |        |        |       |        |       |        |  |  |  |
| 6                                                                            | 151 (A)    | Familial renal cell carcinoma                              | 100876         | 74111  | 75353  | 24930  | 66129  | 83685  | 88391  | 102672 | 92356  | 82089  | 88975  | 84253  | 133601 | 133609 | 99394  | 78526  | 133633 | 86784  | 75075  | 75087  | 92359  | 82051  |        |        |        |        |        |        |        |       |        |       |        |  |  |  |
| 7                                                                            | 217074 (A) | Pancreatic carcinoma                                       | 74111          | 65886  | 208419 | 65945  | 137344 | 92354  | 75321  | 133585 | 82054  | 133605 | 82092  | 208427 | 208429 | 82913  | 84255  | 102666 | 180759 | 103217 | 170146 | 87164  | 216710 |        |        |        |        |        |        |        |        |       |        |       |        |  |  |  |
| 8                                                                            | 422 (C)    | Idiopathic and/or familial pulmonary arterial hypertension | 133561         | 66137  | 75396  | 139919 | 41293  | 88981  | 24978  | 34113  | 103178 | 103137 | 24859  | 65861  | 76908  | 102681 | 69294  | 42603  | 133651 |        |        |        |        |        |        |        |        |        |        |        |        |       |        |       |        |  |  |  |
| 9                                                                            | 88673 (A)  | Hepatocellular carcinoma                                   | 99381          | 101391 | 95991  | 87049  | 103138 | 65887  | 133617 | 65969  | 133643 | 75075  | 99395  | 75992  | 211464 | 138631 |        |        |        |        |        |        |        |        |        |        |        |        |        |        |        |       |        |       |        |  |  |  |
| 10                                                                           | 521 (B)    | Chronic myeloid leukemia                                   | 75375          | 170127 | 41289  | 70930  | 84332  | 69297  | 24999  | 76372  | 133649 | 222393 | 216911 | 229458 |        |        |        |        |        |        |        |        |        |        |        |        |        |        |        |        |        |       |        |       |        |  |  |  |
| 11                                                                           | 803 (C)    | Myotrophic lateral sclerosis                               | 170123         | 82085  | 66138  | 137347 | 25058  | 138011 | 178090 | 91104  | 238094 | 216726 |        |        |        |        |        |        |        |        |        |        |        |        |        |        |        |        |        |        |        |       |        |       |        |  |  |  |
| 12                                                                           | 52688 (A)  | Myelodysplastic syndromes                                  | 170127         | 41289  | 86359  | 77330  | 69297  | 75737  | 178071 | 139925 | 24888  | 133649 |        |        |        |        |        |        |        |        |        |        |        |        |        |        |        |        |        |        |        |       |        |       |        |  |  |  |
| 13                                                                           | 3394 (A)   | Soft tissue sarcomas                                       | 201827         | 70934  | 100230 | 82086  | 134210 | 86783  | 69993  | 133615 | 168043 | 77435  |        |        |        |        |        |        |        |        |        |        |        |        |        |        |        |        |        |        |        |       |        |       |        |  |  |  |
| 14                                                                           | 213504 (A) | Ovarian adenocarcinoma                                     | 208423         | 229454 | 87164  | 84244  | 97958  | 229472 | 77435  |        |        |        |        |        |        |        |        |        |        |        |        |        |        |        |        |        |        |        |        |        |        |       |        |       |        |  |  |  |
| 15                                                                           | 63443 (A)  | Gastric cancer                                             | 84244          | 133585 | 95999  | 92357  | 103151 |        |        |        |        |        |        |        |        |        |        |        |        |        |        |        |        |        |        |        |        |        |        |        |        |       |        |       |        |  |  |  |
| 16                                                                           | 44890 (A)  | Gastrointestinal stromal tumor                             | 102670         | 69297  | 65967  | 90180  | 75087  |        |        |        |        |        |        |        |        |        |        |        |        |        |        |        |        |        |        |        |        |        |        |        |        |       |        |       |        |  |  |  |
| 17                                                                           | 355 (C)    | Gaucher disease                                            | 24932          | 24871  | 65934  | 222655 | 218401 |        |        |        |        |        |        |        |        |        |        |        |        |        |        |        |        |        |        |        |        |        |        |        |        |       |        |       |        |  |  |  |
| 18                                                                           | 33276 (A)  | Kaposi's sarcoma                                           | 33481          | 33527  | 24999  | 33393  | 33545  |        |        |        |        |        |        |        |        |        |        |        |        |        |        |        |        |        |        |        |        |        |        |        |        |       |        |       |        |  |  |  |
| 19                                                                           | 668 (A)    | Osteosarcoma                                               | 92353          | 25011  | 25029  | 73454  | 69991  |        |        |        |        |        |        |        |        |        |        |        |        |        |        |        |        |        |        |        |        |        |        |        |        |       |        |       |        |  |  |  |
| 20                                                                           | 729 (B)    | Polycythemia vera                                          | 164150         | 82360  | 230762 | 216691 | 201839 |        |        |        |        |        |        |        |        |        |        |        |        |        |        |        |        |        |        |        |        |        |        |        |        |       |        |       |        |  |  |  |
| 21                                                                           | 67037 (A)  | Squamous cell carcinoma of head and neck                   | 82842          | 65965  | 95997  | 104081 | 65970  |        |        |        |        |        |        |        |        |        |        |        |        |        |        |        |        |        |        |        |        |        |        |        |        |       |        |       |        |  |  |  |
| 22                                                                           | 54057 (C)  | Thrombotic thrombocytopenic purpura                        | 138623         | 85388  | 178075 | 168064 | 45983  |        |        |        |        |        |        |        |        |        |        |        |        |        |        |        |        |        |        |        |        |        |        |        |        |       |        |       |        |  |  |  |
| 23                                                                           | 733 (A)    | Familial adenomatous polyposis                             | 42563          | 24974  | 201833 | 75671  |        |        |        |        |        |        |        |        |        |        |        |        |        |        |        |        |        |        |        |        |        |        |        |        |        |       |        |       |        |  |  |  |
| 24                                                                           | 77260 (C)  | Gaucher disease, type 2                                    | 102668         | 24932  | 24871  | 101417 |        |        |        |        |        |        |        |        |        |        |        |        |        |        |        |        |        |        |        |        |        |        |        |        |        |       |        |       |        |  |  |  |
| 25                                                                           | 77261 (C)  | Gaucher disease, type 3                                    | 102668         | 24932  | 24871  | 101417 |        |        |        |        |        |        |        |        |        |        |        |        |        |        |        |        |        |        |        |        |        |        |        |        |        |       |        |       |        |  |  |  |
| 26                                                                           | 70573 (A)  | Small cell lung cancer                                     | 137337         | 103134 | 102678 | 133641 |        |        |        |        |        |        |        |        |        |        |        |        |        |        |        |        |        |        |        |        |        |        |        |        |        |       |        |       |        |  |  |  |
| 27                                                                           | 86885 (A)  | Unspecified peripheral T-cell lymphoma                     | 65974          | 90183  | 91102  | 89068  |        |        |        |        |        |        |        |        |        |        |        |        |        |        |        |        |        |        |        |        |        |        |        |        |        |       |        |       |        |  |  |  |
| 28                                                                           | 905 (C)    | Wilson disease                                             | 137334         | 24924  | 25083  | 56897  |        |        |        |        |        |        |        |        |        |        |        |        |        |        |        |        |        |        |        |        |        |        |        |        |        |       |        |       |        |  |  |  |
| 29                                                                           | 2134 (C)   | Atypical hemolytic uremic syndrome                         | 86782          | 82334  | 165349 |        |        |        |        |        |        |        |        |        |        |        |        |        |        |        |        |        |        |        |        |        |        |        |        |        |        |       |        |       |        |  |  |  |
| 30                                                                           | 324 (B)    | Fabry disease                                              | 34115          | 89184  | 33470  |        |        |        |        |        |        |        |        |        |        |        |        |        |        |        |        |        |        |        |        |        |        |        |        |        |        |       |        |       |        |  |  |  |
| 31                                                                           | 97279 (A)  | Insulinoma                                                 | 104084         | 101429 | 168068 |        |        |        |        |        |        |        |        |        |        |        |        |        |        |        |        |        |        |        |        |        |        |        |        |        |        |       |        |       |        |  |  |  |
| 32                                                                           | 1332 (A)   | Medullary thyroid carcinoma                                | 170142         | 82073  | 74769  |        |        |        |        |        |        |        |        |        |        |        |        |        |        |        |        |        |        |        |        |        |        |        |        |        |        |       |        |       |        |  |  |  |
| 33                                                                           | 50251 (A)  | Mesothelioma                                               | 138631         | 51897  | 89928  |        |        |        |        |        |        |        |        |        |        |        |        |        |        |        |        |        |        |        |        |        |        |        |        |        |        |       |        |       |        |  |  |  |
| 34                                                                           | 182090 (C) | Pulmonary arterial hypertension                            | 75396          | 41293  | 34113  |        |        |        |        |        |        |        |        |        |        |        |        |        |        |        |        |        |        |        |        |        |        |        |        |        |        |       |        |       |        |  |  |  |
| 35                                                                           | 801 (C)    | Scleroderma                                                | 41293          | 84314  | 70023  |        |        |        |        |        |        |        |        |        |        |        |        |        |        |        |        |        |        |        |        |        |        |        |        |        |        |       |        |       |        |  |  |  |
| 36                                                                           | 90291 4C)  | Systemic sclerosis                                         | 202542         | 170138 | 231748 |        |        |        |        |        |        |        |        |        |        |        |        |        |        |        |        |        |        |        |        |        |        |        |        |        |        |       |        |       |        |  |  |  |
| 37                                                                           | 903 (C)    | Von Willebrand disease                                     | 33508          | 24966  | 90930  |        |        |        |        |        |        |        |        |        |        |        |        |        |        |        |        |        |        |        |        |        |        |        |        |        |        |       |        |       |        |  |  |  |
| 38                                                                           | 913 (B)    | Zollinger-Ellison syndrome                                 | 104084         | 101429 | 168068 |        |        |        |        |        |        |        |        |        |        |        |        |        |        |        |        |        |        |        |        |        |        |        |        |        |        |       |        |       |        |  |  |  |
| 39                                                                           | 117 (C)    | Behcet disease                                             | 35279          | 168113 |        |        |        |        |        |        |        |        |        |        |        |        |        |        |        |        |        |        |        |        |        |        |        |        |        |        |        |       |        |       |        |  |  |  |
| 40                                                                           | 160 (C)    | Castleman disease                                          | 102672         | 34095  |        |        |        |        |        |        |        |        |        |        |        |        |        |        |        |        |        |        |        |        |        |        |        |        |        |        |        |       |        |       |        |  |  |  |
| 41                                                                           | 877 (A)    | Endocrine tumor                                            | 201829         | 104084 |        |        |        |        |        |        |        |        |        |        |        |        |        |        |        |        |        |        |        |        |        |        |        |        |        |        |        |       |        |       |        |  |  |  |
| 42                                                                           | 100092 (A) | Enteropancreatic endocrine tumor                           | 92356          | 168068 |        |        |        |        |        |        |        |        |        |        |        |        |        |        |        |        |        |        |        |        |        |        |        |        |        |        |        |       |        |       |        |  |  |  |
| 43                                                                           | 58017 (A)  | Hairy cell leukemia                                        | 76827          | 168060 |        |        |        |        |        |        |        |        |        |        |        |        |        |        |        |        |        |        |        |        |        |        |        |        |        |        |        |       |        |       |        |  |  |  |
| 44                                                                           | 69078 (A)  | Liposarcoma                                                | 134210         | 77435  |        |        |        |        |        |        |        |        |        |        |        |        |        |        |        |        |        |        |        |        |        |        |        |        |        |        |        |       |        |       |        |  |  |  |
| 45                                                                           | 652 (B)    | Multiple endocrine neoplasia type 1                        | 104084         | 101429 |        |        |        |        |        |        |        |        |        |        |        |        |        |        |        |        |        |        |        |        |        |        |        |        |        |        |        |       |        |       |        |  |  |  |
| 46                                                                           | 824 (B)    | Myelofibrosis with myeloid metaplasia                      | 164150         | 133591 |        |        |        |        |        |        |        |        |        |        |        |        |        |        |        |        |        |        |        |        |        |        |        |        |        |        |        |       |        |       |        |  |  |  |
| 47                                                                           | 636 (B)    | Neurofibromatosis type 1                                   | 104084         | 101429 |        |        |        |        |        |        |        |        |        |        |        |        |        |        |        |        |        |        |        |        |        |        |        |        |        |        |        |       |        |       |        |  |  |  |
| 48                                                                           | 447 (C)    | Paroxysmal nocturnal hemoglobinuria                        | 82334          | 82336  |        |        |        |        |        |        |        |        |        |        |        |        |        |        |        |        |        |        |        |        |        |        |        |        |        |        |        |       |        |       |        |  |  |  |
| 49                                                                           | 199241 (C) | Pulmonary capillary hemangiomatosis                        | 41293          | 34113  |        |        |        |        |        |        |        |        |        |        |        |        |        |        |        |        |        |        |        |        |        |        |        |        |        |        |        |       |        |       |        |  |  |  |
| 50                                                                           | 90050 (C)  | Retinopathy of prematurity                                 | 83299          | 78519  |        |        |        |        |        |        |        |        |        |        |        |        |        |        |        |        |        |        |        |        |        |        |        |        |        |        |        |       |        |       |        |  |  |  |
| 51                                                                           | 797 (C)    | Sarcoidosis                                                | 82064          | 24859  |        |        |        |        |        |        |        |        |        |        |        |        |        |        |        |        |        |        |        |        |        |        |        |        |        |        |        |       |        |       |        |  |  |  |
| 52                                                                           | 892 (B)    | Von Hippel-Lindau disease                                  | 104084         | 101429 |        |        |        |        |        |        |        |        |        |        |        |        |        |        |        |        |        |        |        |        |        |        |        |        |        |        |        |       |        |       |        |  |  |  |

(A), (B), (C) correspond to subset A, B and C respectively.
