# Supplementary material
Source: PubMed Central journal article supplement (PMC4393717)
Supplement: jcmm0016-2872-sd10.pdf [file jcmm0016-2872-sd10.pdf]

**TABLE S9. Drugs associated to a single angiogenesis-related rare disease**

| n° | Drugs                                                                                                                                                    | Rare diseases Orpha ID | n°  | Drugs                                                                                                                                  | Rare diseases Orpha ID |
|----|----------------------------------------------------------------------------------------------------------------------------------------------------------|------------------------|-----|----------------------------------------------------------------------------------------------------------------------------------------|------------------------|
| 1  | (1S, 2S, 3R, 4R)-3-(5-Fluoro-2-(3-methyl-4-(4-methylpiperazin-1-yl)-phenylamino)-pyrimidin-4-ylamino)-bicyclo[2.2.1]hept-5-ene-2-carboxamide benzoate    | 519 (A)                | 100 | Nilotinib hydrochloride monohydrate                                                                                                    | 44890 (A)              |
| 2  | N-[2-Chloro-4-[(6,7-dimethoxy-4-quinolyl)oxy]phenyl]-N'-(5-methyl-3-isoxazolyl) urea hydrochloride monohydrate                                           | 217071 (A)             | 101 | Velaglucerase alfa                                                                                                                     | 355 (C)                |
| 3  | 2-[4-(5,6-diphenylpyrazin-2-yl)(isopropyl)amino]butoxy]-N-(methylsulfonyl)acetamide                                                                      | 422 (C)                | 102 | Interferon alpha-2b                                                                                                                    | 33276 (A)              |
| 4  | 4-Amino-1-[5-O-[(2R,4S)-2-oxido-4-(4-pyridinyl)-1,3,2-dioxaphosphorinan-2-yl]-D-arabinofuranosyl]-2(1H)-pyrimidinone                                     | 88673 (A)              | 103 | Mifamurtide                                                                                                                            | 668 (A)                |
| 5  | (-)-trans-3-(5,6-dihydro-4H-pyrrolo[3,2,1-ij]quinolin-1-yl)-4-(1H-indol-3-yl) pyrrolidine-2, 5-dione                                                     | 3394 (A)               | 104 | Givinostat                                                                                                                             | 729 (B)                |
| 6  | (6R)-4, 5, 6, 7-tetrahydro-N6-propyl-2, 6-benzothiazole-diamine dihydrochloride monohydrate                                                              | 803 (C)                | 105 | Manganese, dichloro [[4aR, 13aR, 17aR, 21aR]-1, 2, 3, 4, ...tetraazacycloheptadecane-kN5, kN13, kN18, kN21, kN22]                      | 67037 (A)              |
| 7  | Anti-EphA2 monoclonal antibody conjugated to maleimidocaproyl monomethylauristatin phenylalanine                                                         | 213504 (A)             | 106 | Eptacog alfa (activated)                                                                                                               | 733 (A)                |
| 8  | 17-(allylamino)-17-demethoxygeldanamycin, hydroquinone, hydrochloride                                                                                    | 44890 (A)              | 107 | Sabirubicin                                                                                                                            | 70573 (A)              |
| 9  | Alitretinoin                                                                                                                                             | 33276 (A)              | 108 | Zanolimumab                                                                                                                            | 86885 (A)              |
| 10 | 5(S)-[2'-hydroxy ethoxy]-20(S)-camptothecin                                                                                                              | 668 (A)                | 109 | Zinc acetate dihydrate                                                                                                                 | 905 (C)                |
| 11 | Cetuximab                                                                                                                                                | 67037 (A)              | 110 | Carfilzomib                                                                                                                            | 29073 (A)              |
| 12 | Anti-von Willebrand Aptamer                                                                                                                              | 54057 (C)              | 111 | Chimeric antibody to mesothelin                                                                                                        | 217074 (A)             |
| 13 | Celecoxib                                                                                                                                                | 733 (A)                | 112 | N-[4-(3-amino-1H-indazol-4-yl)phenyl]-N'-(2-fluoro-5-methylphenyl) urea                                                                | 88673 (A)              |
| 14 | Amrubicin hydrochloride                                                                                                                                  | 70573 (A)              | 113 | Riluzole                                                                                                                               | 803 (C)                |
| 15 | Miltefosine                                                                                                                                              | 86885 (A)              | 114 | Patupilone (Epothilone B)                                                                                                              | 213504 (A)             |
| 16 | Ammonium tetrathiomolybdate                                                                                                                              | 905 (C)                | 115 | Tegafur, gimeracil, oteracil potassium                                                                                                 | 63443 (A)              |
| 17 | Complement factor H                                                                                                                                      | 2134 (C)               | 116 | Taliglucerase alfa                                                                                                                     | 355 (C)                |
| 18 | Aqalsidase alfa                                                                                                                                          | 324 (B)                | 117 | Paclitaxel                                                                                                                             | 33276 (A)              |
| 19 | Cyclopropane-1,1-dicarboxylic acid [4-(6,7-dimethoxy-quinolin-4-yloxy)-phenyl]-amide (4-fluoro phenyl)-amide, (L)-malate salt                            | 1332 (A)               | 118 | Rapamycin (mTOR) inhibitor                                                                                                             | 668 (A)                |
| 20 | Treprostinil diethanolamine                                                                                                                              | 90291 (C)              | 119 | Soluble yeast beta-1,3/1,6-glucan                                                                                                      | 67037 (A)              |
| 21 | Antihemophilic factor / Von Willebrand factor complex (human)                                                                                            | 903 (C)                | 120 | 5'-O-(trans-9'-octadecenoyl)-1-β-D-arabinofuranosyl cytosine                                                                           | 519 (A)                |
| 22 | Colchicine                                                                                                                                               | 117 (C)                | 121 | Cisplatin (liposomal)                                                                                                                  | 217074 (A)             |
| 23 | (S)-ethyl 2-amino-3-(4-(2-amino-6(R)-1-(4-chloro-2-(3-methyl-1H-pyrazol-1-yl)phenyl)-2,2-trifluoroethoxy)pyrimidin-4-yl)phenyl)propanoate                | 877 (A)                | 122 | Elafin                                                                                                                                 | 422 (C)                |
| 24 | Cladribine                                                                                                                                               | 58017 (A)              | 123 | Nemorubicin hydrochloride                                                                                                              | 88673 (A)              |
| 25 | Antisense Oligonucleotide [ATCCGGAGGGCTCGCCATGCTGCT]                                                                                                     | 90050 (C)              | 124 | Sarsasapogenin                                                                                                                         | 803 (C)                |
| 26 | Aviptadil                                                                                                                                                | 797 (C)                | 125 | Pyr-His-Trp-Ser-Tyr-D-Lys(doxorubicinylglutarate)-Leu-Arg-Pro-Gly-NH2, acetate salt                                                    | 213504 (A)             |
| 27 | Mitotane                                                                                                                                                 | 1501 (A)               | 126 | Deoxyribose phosphorothioate (5'-tct-ccc-agg-gtg-cgc-cat-3')                                                                           | 29073 (A)              |
| 28 | Verteporfine                                                                                                                                             | 279 (C)                | 127 | Cytochrome P450 isoform 2B1 gene transfected human embryonic kidney 293 cells encapsulated in polymeric cellulose sulphate             | 217074 (A)             |
| 29 | 2-Methoxy-5-[(1Z)-2-(3,4,5-trimethoxyphenyl)ethenyl]-phenol                                                                                              | 142 (A)                | 128 | Epoprostenol                                                                                                                           | 422 (C)                |
| 30 | Azathioprin                                                                                                                                              | 2137 (C)               | 129 | Nolatrexed                                                                                                                             | 88673 (A)              |
| 31 | Maribavir                                                                                                                                                | 137698 (C)             | 130 | Fenretinide                                                                                                                            | 3394 (A)               |
| 32 | Mifepristone                                                                                                                                             | 99889 (C)              | 131 | Amonafide L-malate                                                                                                                     | 519 (A)                |
| 33 | Recombinant human anti-interferon gamma monoclonal antibody                                                                                              | 158032 (C)             | 132 | Pegylated arginine deiminase                                                                                                           | 88673 (A)              |
| 34 | Human normal immunoglobulin                                                                                                                              | 2331 (C)               | 133 | Nilotinib                                                                                                                              | 521 (B)                |
| 35 | Vinblastine                                                                                                                                              | 389 (B)                | 134 | Mammalian target of rapamycin (mTOR) inhibitor                                                                                         | 3394 (A)               |
| 36 | Adenoviral vector containing human p53 gene                                                                                                              | 524 (A)                | 135 | Xaliproden hydrochloride                                                                                                               | 803 (C)                |
| 37 | Iobenguane sulfate I 131                                                                                                                                 | 717 (A)                | 136 | Antisense oligonucleotide 5'-d[P-Thio] (CCCTG CTCCC CCCTG GCTCC)-3'                                                                    | 519 (A)                |
| 38 | Raloxifene hydrochloride                                                                                                                                 | 774 (B)                | 137 | Carmustine                                                                                                                             | 360 (A)                |
| 39 | Abetimus sodium                                                                                                                                          | 536 (C)                | 138 | Human anti-intercellular adhesion molecule-1 monoclonal antibody                                                                       | 29073 (A)              |
| 40 | Chimeric monoclonal antibody to shiga-toxin 1 and 2                                                                                                      | 90038 (C)              | 139 | Human telomerase reverse transcriptase peptide (611-626)                                                                               | 217074 (A)             |
| 41 | Vincristine sulfate liposomes                                                                                                                            | 39044 (A)              | 140 | Iloprost trometamol                                                                                                                    | 422 (C)                |
| 42 | 1,2-bis(methylsulphonyl)-1-(2-chloroethyl)-2-[(methylamino)carbonyl]hydrazine                                                                            | 519 (A)                | 141 | Seocalcitol                                                                                                                            | 88673 (A)              |
| 43 | Aplidine                                                                                                                                                 | 29073 (A)              | 142 | N-acetylsarcosyl-glycyl-L-valyl-D-allo-isoleucyl-L-threonyl-L-norvalyl-L-isoleucyl-L-arginyl-L-prolyl-N-ethylamide                     | 3394 (A)               |
| 44 | 4-imino-1, 3-diazobicyclo-[3.1.0]-hexan-2-one                                                                                                            | 217074 (A)             | 143 | Autologous Olfactory Neural Progenitors                                                                                                | 803 (C)                |
| 45 | Ambrisentan                                                                                                                                              | 422 (C)                | 144 | Human monoclonal antibody against HLA-DR                                                                                               | 29073 (A)              |
| 46 | 4-[3,5-bis(trimethylsilyl)benzamido] benzoic acid                                                                                                        | 88673 (A)              | 145 | Iodine (I131) anti-CEA sheep-human chimeric monoclonal antibody                                                                        | 217074 (A)             |
| 47 | Arimoclomol                                                                                                                                              | 803 (C)                | 146 | Methyl 4,6-diamino-2-[1-(2-fluorobenzyl)-1H-pyrazolo[3,4-b]pyridine-3-yl]-5-pyrimidinyl(methyl)carbamate                               | 422 (C)                |
| 48 | (3S)-3-{4-[7-(aminocarbonyl)-2H-indazol-2-yl] phenyl} piperidine tosylate monohydrate salt                                                               | 213504 (A)             | 147 | Bafetinib                                                                                                                              | 521 (B)                |
| 49 | Daunorubicin liposome injection                                                                                                                          | 33276 (A)              | 148 | Palifosfamide                                                                                                                          | 3394 (A)               |
| 50 | Folinic acid                                                                                                                                             | 668 (A)                | 149 | Recombinant human vascular endothelial growth factor                                                                                   | 803 (C)                |
| 51 | Acetylsalicylic acid                                                                                                                                     | 729 (B)                | 150 | Humanised anti-HM1.24 monoclonal antibody                                                                                              | 29073 (A)              |
| 52 | Humanised antibody fragment (Ep-CAM)-truncated Pseudomonas exotoxin A fusion protein                                                                     | 67037 (A)              | 151 | L-asparaginase encapsulated in erythrocytes                                                                                            | 217074 (A)             |
| 53 | Defibrotide                                                                                                                                              | 54057 (C)              | 152 | Sulfonated monophosphorylated mannose oligosaccharide                                                                                  | 88673 (A)              |
| 54 | Eflornithine hydrochloride                                                                                                                               | 733 (A)                | 153 | Benamide, 3-[2-imidazo[1,2-b]pyridazin-3-ylethynyl]-4-methyl-N-[4-[(4-methyl-1-piperazinyl)methyl]-3-(trifluoromethyl)phenyl]          | 521 (B)                |
| 55 | H-Arg-Leu-Phe-Phe-Tyr-Arg-Lys-Ser-Val-OH, acetate salt & H-Tyr-Leu-Phe-Phe-Tyr-Arg-Lys-Ser-Val-OH, acetate salt                                          | 70573 (A)              | 154 | Clofarabine                                                                                                                            | 519 (A)                |
| 56 | Trientine dihydrochloride                                                                                                                                | 905 (C)                | 155 | Imexon                                                                                                                                 | 29073 (A)              |
| 57 | Migalastat hydrochloride                                                                                                                                 | 324 (B)                | 156 | Masitinib mesilate                                                                                                                     | 217074 (A)             |
| 58 | Metastable technetium 99 [99mTc] Demogastrin 2                                                                                                           | 1332 (A)               | 157 | Sildenafil citrate                                                                                                                     | 422 (C)                |
| 59 | Pemetrexed disodium                                                                                                                                      | 50251 (A)              | 158 | Thymalfasin                                                                                                                            | 88673 (A)              |
| 60 | Halofuginone Hydrobromide                                                                                                                                | 801 (C)                | 159 | Bosutinib                                                                                                                              | 521 (B)                |
| 61 | Type I native bovine skin collagen                                                                                                                       | 90291 (C)              | 160 | Daunorubicin (liposomal)                                                                                                               | 519 (A)                |
| 62 | Desmopressine acetate                                                                                                                                    | 903 (C)                | 161 | N-[(2S)-2,3-dihydroxypropyl]-3-[(2-fluoro-4-iodophenyl)amino]isonicotinamide hydrochloride                                             | 217074 (A)             |
| 63 | Recombinant human residue 41 glutamic acid to glutamine variant of Interferon-alfa-2b                                                                    | 117 (C)                | 162 | Sitaxentan sodium                                                                                                                      | 422 (C)                |
| 64 | Humanised anti-human Interleukin-6 (IL-6) receptor monoclonal antibody (Genetic Recombination)                                                           | 160 (C)                | 163 | Vaccinia GM-CSF/TK-deactivated virus                                                                                                   | 88673 (A)              |
| 65 | Murine anti-CD22 antibody variable region fused to truncated Pseudomonas exotoxin 38                                                                     | 58017 (A)              | 164 | Fluorouracil                                                                                                                           | 360 (A)                |
| 66 | H-Tyrosine-Glycine-Phenylalanine-Glycine-Glycine-OH                                                                                                      | 824 (B)                | 165 | Melphalan                                                                                                                              | 29073 (A)              |
| 67 | Myristoylated-peptidyl-recombinant Human CD59                                                                                                            | 447 (C)                | 166 | Terquid                                                                                                                                | 422 (C)                |
| 68 | Mecasermin rinfabate                                                                                                                                     | 90050 (C)              | 167 | Gemtuzumab Ozogamicin                                                                                                                  | 519 (A)                |
| 69 | 1-Cyclopropyl-3-[3-(5-morpholin-4-ylmethyl-1H-benzoimidazol-2-yl)-1H-pyrazol-4-yl]-urea                                                                  | 519 (A)                | 168 | Milatumumab                                                                                                                            | 29073 (A)              |
| 70 | 5'-O-(trans-9'-octadecenoyl)-1-beta-D-2'-deoxy-2'-difluorocytidine                                                                                       | 217074 (A)             | 169 | Paclitaxel (liposomal)                                                                                                                 | 217074 (A)             |
| 71 | Doxorubicin carbon/iron magnetically targeted microparticles                                                                                             | 88673 (A)              | 170 | Treprostinil diethanolamine (oral use)                                                                                                 | 422 (C)                |
| 72 | Brostallicin                                                                                                                                             | 3394 (A)               | 171 | Histamine dihydrochloride                                                                                                              | 519 (A)                |
| 73 | Cholest-4-en-3-one, oxime                                                                                                                                | 803 (C)                | 172 | Rubitecan                                                                                                                              | 217074 (A)             |
| 74 | Plevitrexed                                                                                                                                              | 63443 (A)              | 173 | Treprostinil sodium (inhalation use)                                                                                                   | 422 (C)                |
| 75 | Miglustat                                                                                                                                                | 355 (C)                | 174 | N2-Deacetyl-N2-[4-methyl-4-(oxobutylidithio)-1-oxopentyl]-maytansine-chimerized anti-CD138 IgG4 monoclonal antibody                    | 29073 (A)              |
| 76 | Methotrexate                                                                                                                                             | 668 (A)                | 175 | S-[2,3-bis(palmitoyloxy)-(2R)-propyl]-cysteinyI-GNNDENSNISFKEK                                                                         | 217074 (A)             |
| 77 | 11-(2-pyrrolidin-1-yl-ethoxy)-14,19-dioxo-5,7,26-triaza-tetracyclo[19.3.1.1(2,6).1(8,12)]heptacosane-1(25),2(26),3,5,8,10,12(27),16,21,23-decaene        | 729 (B)                | 176 | Vasoactive intestinal peptide                                                                                                          | 422 (C)                |
| 78 | Leukocyte interleukin                                                                                                                                    | 67037 (A)              | 177 | Human monoclonal antibody against inhibitory killer cell Ig-like receptors (1-7 F9)                                                    | 519 (A)                |
| 79 | Nanobody directed towards the human A1 domain of von Willebrand factor                                                                                   | 54057 (C)              | 178 | Human transferrin conjugated to mutant diphtheria toxin                                                                                | 360 (A)                |
| 80 | Eicosapentaenoic acid                                                                                                                                    | 733 (A)                | 179 | Lestaurtinib                                                                                                                           | 519 (A)                |
| 81 | Picoplatin                                                                                                                                               | 70573 (A)              | 180 | Recombinant histidine-tagged idiotype immunoglobulin Fab fragment of clonal B-cell receptors                                           | 29073 (A)              |
| 82 | Romidepsin                                                                                                                                               | 86885 (A)              | 181 | Yttrium (90Y)-DOTA-radiolabelled humanized monoclonal antibody against mucin 1                                                         | 217074 (A)             |
| 83 | Zinc acetate                                                                                                                                             | 905 (C)                | 182 | Vorinostat                                                                                                                             | 29073 (A)              |
| 84 | Recombinant human minibody against complement component C5                                                                                               | 2134 (C)               | 183 | Brivudine                                                                                                                              | 217074 (A)             |
| 85 | Alpha-Galactosidase A                                                                                                                                    | 324 (B)                | 184 | Mitoxantrone                                                                                                                           | 519 (A)                |
| 86 | Vandetanib                                                                                                                                               | 1332 (A)               | 185 | Dexamethasone (40 mg tablet)                                                                                                           | 29073 (A)              |
| 87 | Ranpirnase                                                                                                                                               | 50251 (A)              | 186 | N-(2-amino-phenyl)-4-(4-pyridin-3-yl-pyrimidin-2-ylamino)-methyl benzamide                                                             | 519 (A)                |
| 88 | Peptide 144 TGF-beta1-inhibitor (TSLDASIWMQMGN)                                                                                                          | 801 (C)                | 187 | Perifosine                                                                                                                             | 29073 (A)              |
| 89 | Human engineered monoclonal antibody specific for transforming growth factor β1 (TGF-β1)                                                                 | 90291 (C)              | 188 | N-(5-tert-Butylisoxazol-3-yl)-N'-(4-[7-(2-(morpholin-4-yl)ethoxy)imidazo[2,1-b][1,3]benzothiazol-2-yl]phenyl)urea dihydrochloride salt | 519 (A)                |
| 90 | Human coagulation factor VIII (antihemophilic A factor)                                                                                                  | 903 (C)                | 189 | Recombinant human histone H1.3 and recombinant human N-bis-met-histone H1.3                                                            | 519 (A)                |
| 91 | 2-[3-[(4-[(5-[(2-[[3-Fluorophenylamino]-2-oxoethyl]-1H-pyrazol-3-yl)amino]-quinazolin-7-yl)oxy]propyl)(ethyl)amino]ethyl dihydrogen phosphate trihydrate | 519 (A)                | 190 | Ribonucleotide reductase R2 specific phosphorothioate oligonucleotide                                                                  | 519 (A)                |
| 92 | Bortezomib                                                                                                                                               | 29073 (A)              | 191 | Tipifarnib                                                                                                                             | 519 (A)                |
| 93 | Bovine bile extract                                                                                                                                      | 217074 (A)             | 192 | Tosedostat                                                                                                                             | 519 (A)                |
| 94 | Beraprost sodium (modified release tablet)                                                                                                               | 422 (C)                | 193 | Troxacitabine                                                                                                                          | 519 (A)                |
| 95 | Doxorubicin polyisohexylcyanoacrylate nanoparticles                                                                                                      | 88673 (A)              | 194 | Zosquidar trihydrochloride                                                                                                             | 519 (A)                |
| 96 | Dasatinib                                                                                                                                                | 521 (B)                | 195 | 2-methoxymethyl-2-hydroxymethyl-1-azabicyclo [2.2.2] octan-3-one                                                                       | 519 (A)                |
| 97 | Deforolimus                                                                                                                                              | 3394 (A)               | 196 | Temozolomide                                                                                                                           | 360 (A)                |
| 98 | Filgrastim                                                                                                                                               | 803 (C)                | 197 | Recombinant fusion protein consisting of the extracellular portion of CD95 fused to the Fc part of a human IgG1 molecule               | 360 (A)                |
| 99 | R-1-[2,3-dihydro-2-oxo-1-pivaloylmethyl-5-(2-pyridyl)-1H-1,4-benzodiazepin-3-yl]-3-(3-methylaminophenyl)urea                                             | 63443 (A)              | 198 | Tranilast                                                                                                                              | 360 (A)                |

(A), (B), (C) correspond to subset A, B and C respectively.
