# Supplementary material
Source: PubMed Central journal article supplement (PMC4393717)
Supplement: jcmm0016-2872-sd11.pdf [file jcmm0016-2872-sd11.pdf]

**TABLE S10. Drugs associated to two or more angiogenesis-related rare diseases**

| nº | Drugs                                                                                                                                                                                                      | Rare diseases Orpha ID |            |            |            |           |         |
|----|------------------------------------------------------------------------------------------------------------------------------------------------------------------------------------------------------------|------------------------|------------|------------|------------|-----------|---------|
|    |                                                                                                                                                                                                            | 1                      | 2          | 3          | 4          | 5         |         |
| 1  | Lutetium (177Lu)-N-[(4,7,10-Tricarboxymethyl-1,4,7,10-tetraazacyclododec-1-yl)acetyl]-D-phenylalanyl- L-cysteiny-L-tyrosyl-D-tryptophanyl-L-lysyl-L-threoninyl-L-cysteiny-L-threonine-cyclic(2-7)disulfide | 892 (B)                | 877 (A)    | 636 (B)    | 652 (B)    | 97279 (A) | 913 (B) |
| 2  | Pasireotide                                                                                                                                                                                                | 892 (B)                | 636 (B)    | 652 (B)    | 97279 (A)  | 913 (B)   |         |
| 3  | 26 base single stranded phosphodiester DNA oligonucleotide                                                                                                                                                 | 217071 (A)             | 151 (A)    | 519 (A)    | 217074 (A) |           |         |
| 4  | Bosentan monohydrate                                                                                                                                                                                       | 801 (C)                | 199241 (C) | 182090 (C) | 422 (C)    |           |         |
| 5  | Autologous Tumor-Derived gp96 Heat Shock Protein-Peptide Complex                                                                                                                                           | 217071 (A)             | 360 (A)    | 151 (A)    | 182067 (A) |           |         |
| 6  | Arsenic trioxide                                                                                                                                                                                           | 52688 (A)              | 29073 (A)  | 521 (B)    | 519 (A)    |           |         |
| 7  | Chimeric-anti-interleukin-6 monoclonal antibody                                                                                                                                                            | 217071 (A)             | 160 (C)    | 151 (A)    | 29073 (A)  |           |         |
| 8  | Bevacizumab                                                                                                                                                                                                | 217071 (A)             | 360 (A)    | 213504 (A) | 217074 (A) |           |         |
| 9  | Alglucerase                                                                                                                                                                                                | 355 (C)                | 77260 (C)  | 77261 (C)  |            |           |         |
| 10 | Imiglucerase                                                                                                                                                                                               | 355 (C)                | 77260 4C)  | 77261 (C)  |            |           |         |
| 11 | Yttrium (90Y) edotreotide                                                                                                                                                                                  | 100092 (A)             | 97279 (A)  | 913 (B)    |            |           |         |
| 12 | Imatinib mesilate                                                                                                                                                                                          | 52688 (A)              | 44890 (A)  | 521 (B)    |            |           |         |
| 13 | Allogeneic ex vivo expanded umbilical cord blood cells                                                                                                                                                     | 52688 (A)              | 521 (B)    | 519 (A)    |            |           |         |
| 14 | Iloprost                                                                                                                                                                                                   | 199241 (C)             | 182090 (C) | 422 (C)    |            |           |         |
| 15 | Everolimus                                                                                                                                                                                                 | 217071 (A)             | 100092 (A) | 151 (A)    |            |           |         |
| 16 | Trabectedin                                                                                                                                                                                                | 3394 (A)               | 213504 (A) | 69078 (A)  |            |           |         |
| 17 | Sorafenib                                                                                                                                                                                                  | 217071 (A)             | 151 (A)    | 88673 (A)  |            |           |         |
| 18 | Sunitinib malate                                                                                                                                                                                           | 217071 (A)             | 151 (A)    | 44890 (A)  |            |           |         |
| 19 | Nimotuzumab                                                                                                                                                                                                | 360 (A)                | 182067 (A) | 217074 (A) |            |           |         |
| 20 | Val-Leu-Gln-Glu-Leu-Asn-Val-Thr-Val (Pr1 nanopeptide, sequence 169-177, of proteinase 3)                                                                                                                   | 52688 (A)              | 521 (B)    | 519 (A)    |            |           |         |
| 21 | Talampanel                                                                                                                                                                                                 | 360 (A)                | 803 (C)    | 182067 (A) |            |           |         |
| 22 | Trabedersen                                                                                                                                                                                                | 360 (A)                | 182067 (A) | 217074 (A) |            |           |         |
| 23 | 4,6,8-trihydroxy-10-(3,7,11-trimethyldodeca-2,6,10-trienyl)-5,10-dihydrodibenzob[e][1,4] diazepin-11-one                                                                                                   | 360 (A)                | 182067 (A) |            |            |           |         |
| 24 | 17-allylamino-17-demethoxygeldanamycin                                                                                                                                                                     | 29073 (A)              | 521 (B)    |            |            |           |         |
| 25 | (R)-3-(4-(7H-pyrrolo[2,3-d]pyrimidin-4-yl)-1H-pyrazol-1-yl)-3-cyclopentylpropanenitrile phosphate                                                                                                          | 824 (B)                | 729 (B)    |            |            |           |         |
| 26 | (1R,2R)-octanoic acid[2-(2',3'-dihydro-benzo[1,4] dioxin-6'-yl)-2-hydroxy-1-pyrrolidin-1-ylmethyl-ethyl]-amide-L-tartaric acid salt                                                                        | 77260 (C)              | 77261 (C)  |            |            |           |         |
| 27 | Ethanol (96 per cent ) (gel for injection)                                                                                                                                                                 | 83454 (A)              | 2451 (B)   |            |            |           |         |
| 28 | 4-[123I] iodo-L-phenylalanine                                                                                                                                                                              | 360 (A)                | 182067 (A) |            |            |           |         |
| 29 | (R, S)-3-(bromomethyl)-3-butanol-1-yl-diphosphate                                                                                                                                                          | 217071 (A)             | 151 (A)    |            |            |           |         |
| 30 | Pralatrexate                                                                                                                                                                                               | 86885 (A)              | 209989 (A) |            |            |           |         |
| 31 | Ecilizumab                                                                                                                                                                                                 | 447 (C)                | 2134 (C)   |            |            |           |         |
| 32 | 4-[131I]iodo-L-phenylalanine                                                                                                                                                                               | 360 (A)                | 182067 (A) |            |            |           |         |
| 33 | Beraprost sodium                                                                                                                                                                                           | 182090 (C)             | 422 (C)    |            |            |           |         |
| 34 | 5-aminolevulinic acid hydrochloride                                                                                                                                                                        | 360 (A)                | 182067 (A) |            |            |           |         |
| 35 | 4-amino-5-oxo-4 (pyridinium-1-ylmethyl) proline                                                                                                                                                            | 217071 (A)             | 151 (A)    |            |            |           |         |
| 36 | Catumaxomab                                                                                                                                                                                                | 213504 (A)             | 63443 (A)  |            |            |           |         |
| 37 | Recombinant human ADAMTS-13                                                                                                                                                                                | 54057 (C)              | 93585 (C)  |            |            |           |         |
| 38 | Isofagomine tartrate                                                                                                                                                                                       | 77260 (C)              | 77261 (C)  |            |            |           |         |
| 39 | Adenovirus-mediated Herpes Simplex Virus-thymidine kinase (HKSV-tk) gene                                                                                                                                   | 360 (A)                | 182067 (A) |            |            |           |         |
| 40 | Aldesleukin                                                                                                                                                                                                | 217071 (A)             | 151 (A)    |            |            |           |         |
| 41 | Rituximab                                                                                                                                                                                                  | 54057 (C)              | 183 (C)    |            |            |           |         |
| 42 | Ecteinascidin 743                                                                                                                                                                                          | 3394 (A)               | 69078 (A)  |            |            |           |         |
| 43 | Autologous dendritic cells pulsed with autologous cell lysate                                                                                                                                              | 360 (A)                | 182067 (A) |            |            |           |         |
| 44 | Autologous renal cell tumor vaccine                                                                                                                                                                        | 217071 (A)             | 151 (A)    |            |            |           |         |
| 45 | Interferon alfa 2A                                                                                                                                                                                         | 33276 (A)              | 521 (B)    |            |            |           |         |
| 46 | Biotinylated anti-tenascin monoclonal antibody for use with 90-Yttrium                                                                                                                                     | 360 (A)                | 182067 (A) |            |            |           |         |
| 47 | Doxorubicin hydrochloride (liposomal)                                                                                                                                                                      | 3394 (A)               | 29073 (A)  |            |            |           |         |
| 48 | G17(9) gastrin-diphtheria toxoid conjugate                                                                                                                                                                 | 63443 (A)              | 217074 (A) |            |            |           |         |
| 49 | Chimeric IgG monoclonal antibody cG250                                                                                                                                                                     | 217071 (A)             | 151 (A)    |            |            |           |         |
| 50 | Carmustine (solution for intratumoral injection)                                                                                                                                                           | 360 (A)                | 182067 (A) |            |            |           |         |
| 51 | Azacitidine                                                                                                                                                                                                | 52688 (A)              | 519 (A)    |            |            |           |         |
| 52 | Cilengitide                                                                                                                                                                                                | 360 (A)                | 182067 (A) |            |            |           |         |
| 53 | Nitric oxide                                                                                                                                                                                               | 797 (C)                | 422 (C)    |            |            |           |         |
| 54 | Doxorubicin hydrochloride (drug eluting beads)                                                                                                                                                             | 360 (A)                | 182067     |            |            |           |         |
| 55 | Genetically modified allogeneic (human) tumour cells for the expression of IL-7, GM-CSF, CD80 and CD154, in fixed combination with a DNA-based double stem loop immunomodulator (dSLIM)                    | 217071 (A)             | 151 (A)    |            |            |           |         |
| 56 | Enzastaurin hydrochloride                                                                                                                                                                                  | 360 (A)                | 182067 (A) |            |            |           |         |
| 57 | HLA class I/II binding tumour associated peptides (ADF-APO-CCN-GUC-K67-MET-MMPMMPMUC-RGS                                                                                                                   | 217071 (A)             | 151 (A)    |            |            |           |         |
| 58 | Lenalidomide                                                                                                                                                                                               | 52688 (A)              | 29073 (A)  |            |            |           |         |
| 59 | Decitabine                                                                                                                                                                                                 | 52688 (A)              | 519 (A)    |            |            |           |         |
| 60 | Human interleukin-2 (glycosylated tetrasaccharide, glycosylated trisaccharide and nonglycosylated) (inhalation use)                                                                                        | 217071 (A)             | 151 (A)    |            |            |           |         |
| 61 | NGR-human Tumour Necrosis Factor                                                                                                                                                                           | 50251 (A)              | 88673 (A)  |            |            |           |         |
| 62 | Gadodiamide (liposomal)                                                                                                                                                                                    | 360 (A)                | 182067 (A) |            |            |           |         |
| 63 | Humanized anti-KSA monoclonal antibody-human interleukin-2 fusion protein                                                                                                                                  | 217071 (A)             | 151 (A)    |            |            |           |         |
| 64 | Gimatecan                                                                                                                                                                                                  | 360 (A)                | 182067 (A) |            |            |           |         |
| 65 | Iodine (131I) chimeric IgG monoclonal antibody cG250                                                                                                                                                       | 217071 (A)             | 151 (A)    |            |            |           |         |
| 66 | N-(methyl-diazacyclohexyl-methylbenzamide)-azaphenyl-aminothiopyrrole                                                                                                                                      | 29073 (A)              | 44890 (A)  |            |            |           |         |
| 67 | Homoharringtonine                                                                                                                                                                                          | 521 (B)                | 519 (A)    |            |            |           |         |
| 68 | Herpes simplex virus lacking infected cell protein 34.5                                                                                                                                                    | 360 (A)                | 182067 (A) |            |            |           |         |
| 69 | Naptumomab estafenatox                                                                                                                                                                                     | 217071 (A)             | 151 (A)    |            |            |           |         |
| 70 | Pazopanib hydrochloride                                                                                                                                                                                    | 217071 (A)             | 151 (A)    |            |            |           |         |
| 71 | Pomalidomide                                                                                                                                                                                               | 29073 (A)              | 729 (B)    |            |            |           |         |
| 72 | Iodine (131I) Chlorotoxin                                                                                                                                                                                  | 360 (A)                | 182067 (A) |            |            |           |         |
| 73 | Recombinant human interleukin-21                                                                                                                                                                           | 217071 (A)             | 151 (A)    |            |            |           |         |
| 74 | Lintuzumab                                                                                                                                                                                                 | 52688 (A)              | 519 (A)    |            |            |           |         |
| 75 | Iodine (131I) anti-nucleohistone H1 chimeric biotinylated monoclonal antibody                                                                                                                              | 360 (A)                | 182067 (A) |            |            |           |         |
| 76 | Recombinant modified vaccinia Ankara expressing human 5T4                                                                                                                                                  | 217071 (A)             | 151 (A)    |            |            |           |         |
| 77 | Thalidomide                                                                                                                                                                                                | 52688 (A)              | 29073 (A)  |            |            |           |         |
| 78 | Midostaurin                                                                                                                                                                                                | 98292 (A)              | 519 (A)    |            |            |           |         |
| 79 | Iodine (131I) anti-tenascin monoclonal antibody 81C6                                                                                                                                                       | 360 (A)                | 182067 (A) |            |            |           |         |
| 80 | Irinotecan hydrochloride (drug eluting beads)                                                                                                                                                              | 360 (A)                | 182067 (A) |            |            |           |         |
| 81 | Talactoferrinin alfa                                                                                                                                                                                       | 217071 (A)             | 151 (A)    |            |            |           |         |
| 82 | Sapactabine                                                                                                                                                                                                | 52688 (A)              | 519 (A)    |            |            |           |         |
| 83 | Oligonucleotide phosphorothioate (TAAACGTTATAACGTTATGACGTCAT)                                                                                                                                              | 360 (A)                | 182067 (A) |            |            |           |         |
| 84 | Pseudomonas exotoxin (domains II/III)-Interleukin 13 chimeric protein                                                                                                                                      | 360 (A)                | 182067 (A) |            |            |           |         |
| 85 | Recombinant fusion protein of circularly-permuted IL-4 and pseudomonas exotoxin A, [IL-4(38-37)-PE38KDEL]                                                                                                  | 360 (A)                | 182067 (A) |            |            |           |         |
| 86 | Topotecan hydrochloride (liposomal)                                                                                                                                                                        | 360 (A)                | 182067 (A) |            |            |           |         |
| 87 | Temsirolimus                                                                                                                                                                                               | 217071 (A)             | 151 (A)    |            |            |           |         |

(A), (B), (C) correspond to subset A, B and C respectively.
